# Supplementary material
Source: PubMed Central journal article supplement (PMC5271921)
Supplement: NIHMS6471-supplement-supp_info.pdf [file NIHMS6471-supplement-supp_info.pdf]

FigS1



FigS2



FigS3



FigS4



## **Supplementary Information**

### **Neuronal morphometry directly from bitmap images**

Tiago A. Ferreira, Arne V. Blackman, Julia Oyrer, Andrew J. Chung, Sriram Jayabal, Alanna J. Watt, P. Jesper Sjöström, Donald J. van Meyel

### **Contents**

|                              |          |
|------------------------------|----------|
| <b>Supplementary Figures</b> | <b>2</b> |
| <b>Supplementary Methods</b> | <b>4</b> |
| <b>Supplementary Files</b>   | <b>5</b> |

## Supplementary Figures

### Supplementary Figure 1. Overview of the *Sholl Analysis* software.

- 1 (a) User interface, version 3.4. Sub-modules noted in blue.
- 2 (b) Maximum intensity projection of a *Drosophila* class IV dendritic arborization  
3 sensory neuron (ddaC) labeled by the *ppk1.9-GAL4*-driven reporter *UAS-mCD8::GFP*, a  
4 sample image distributed with the plug-in. The annulus formed by *Starting radius* (the  
5 first sampled distance) and *Critical radius* is indicated. Outer arc depicts *Enclosing*  
6 *radius*, the distance to the most distal dendritic tip.
- 7 (c) Semi-log plot of the cell depicted in (b), where the number of intersections was  
8 normalized to the area of each sampled shell. Two regression lines are shown to  
9 demonstrate that curves can be fitted to all data points, or to a subset restricted to the 10<sup>th</sup>  
10 to 90<sup>th</sup> percentiles of the data (shaded in gray).  $R^2$  is the coefficient of determination, and  
11  $k$  the *Sholl regression coefficient*.
- 12 (d) Linear Sholl plot of the cell in (b). Key metrics include *Critical value* ( $N_m$ ), *Critical*  
13 *radius* ( $r_c$ ) and *Mean value* ( $N_{av}$ ). Differences between sampled and fitted maxima are  
14 shaded in gray. The centroid of the sampled profile is marked ( $\times$ ). *Schoenen ramification*  
15 *index* ( $RI$ ) is the ratio between number of branches at the maximum and the number  
16 primary branches, using either sampled data or the fitted  $N_m$ . The number of primary  
17 branches can be entered manually, or drawn from the number of intersections at *Starting*  
18 *radius*.

### Supplementary Figure 2. Accuracy of bitmap image-based *Sholl Analysis*.

- 19 (a) Maximum intensity projection of an Alexa 594 dye-filled layer-5 pyramidal neuron of  
20 juvenile mouse visual cortex<sup>1</sup>. Arrowheads highlight the apical tuft (top) and the soma  
21 (bottom).
- 22 (b) Manually reconstructed dendrites (blue) and axon (magenta) of the neuron in (a).
- 23 (c) Linear Sholl plots from bitmap images (dots), following either manual segmentation  
24 (“user segm.”) or automated segmentation of the image stack. For comparison, results  
25 from reconstruction-based analysis are plotted for the axon (dashed magenta line) and  
26 dendrites (solid blue line). The plot of the left corresponds to the basal region populated  
27 by both axonal and dendritic arbors, while the plot on the right corresponds to apical  
28 dendrites.
- 29 (d) Bland-Altman plot to examine the agreement between the bitmap approach and traced  
30 reconstruction approach for three different neurons (numbered and color-coded). Each  
31 data point represents the count of intersections at a particular distance from the apical

1 bifurcation: pairwise differences between the two approaches at each distance are plotted  
 2 against each mean. The 95% limits of agreement for individual cells are shown to the  
 3 right, as is the average for all three cells and the average bias (dotted lines).

**Supplementary Figure 3. Resilience of bitmap image-based morphometry to image degradation over a range of synthetic noise.**

4 **(a)** Maximum intensity projection of an axonal arbor of a *Drosophila* olfactory projection  
 5 neuron from the DIADEM Challenge dataset (*OP\_I*)<sup>2,3</sup>. We contaminated the original  
 6 stack (voxel size: 0.33×0.33×1.0μm) with Poisson noise, using increasing multiples of  
 7 the stack standard deviation ( $\sigma = 9.55$ ) as the probability mass function of the Poisson  
 8 random variable. This noise was either added (+) or subtracted (−), over a range from  
 9  $-18\sigma$  to  $+18\sigma$ . Images are shown with the coefficient of determination below each image  
 10 ( $R^2$ , mean  $\pm$  s.d.) to indicate the degree of similarity with the original;  $R^2 = 1$  corresponds  
 11 to identical images. Arrowheads indicate the Sholl analysis center (see b).

12 **(b)** Each graph represents one of 7 metrics (3 from sampled data, 4 from fitted data) that  
 13 were calculated from Sholl plots generated directly from bitmap images with *Sholl*  
 14 *Analysis* (“Bitmap”), or from their respective reconstructions traced with *Neural Circuit*  
 15 *Tracer*<sup>4</sup> (“Reconstruction”). The parameters and routines used to retrieve the data were  
 16 fixed (See **Supplementary Methods** and **Supplementary Files** for details). Shaded areas  
 17 in each graph (light gray) indicate the range of noise ( $-14\sigma$  to  $+8\sigma$ ) over which metrics  
 18 were largely consistent with those calculated from the original image (zero noise, dark  
 19 grey vertical bar). Dashed lines indicate two references calculated at zero noise: one from  
 20 a user-derived manual segmentation of the stack (“Bitmap reference”, blue) and one from  
 21 the DIADEM gold standard reconstruction (red). For each metric, the concordance  
 22 correlation coefficient ( $\rho_c$ )<sup>5</sup> between the bitmap approach and reconstruction approach are  
 23 shown.

24 **Supplementary Figure 4. Sholl-based metrics of Type-1 and Type-2 PV**  
 25 **interneurons.**

26 Metrics loading on the first principal component (71.6% of observed variation), used as  
 27 clustering variable in **Fig. 1c**: **(a)** Sholl regression coefficient, **(b)** Sum of intersections,  
 28 **(c)** Distance associated with at least two intersections (a modified *Enclosing radius*), **(d)**  
 29 Centroid radius, **(e)** Centroid value, **(f)** Critical value, **(g)** Mean value, **(h)** Critical radius.  
 30 Values enclosed by brackets depict factor loadings. Because pipette fluorescence could  
 31 not be entirely eliminated near the soma, the *number of primary branches* and *Schoenen*  
 32 *ramification indices* were excluded from the analysis.

## Supplementary Methods

### Programming

1 Programming was performed with Eclipse SDK 3.7.2 (Eclipse Foundation) and Fiji's  
2 built-in Script Editor. The source code of *Sholl Analysis* is available through the plug-in's  
3 internet documentation page ([http://fiji.sc/Sholl\\_Analysis](http://fiji.sc/Sholl_Analysis)).

### Image Acquisition

4 Images acquisition has been described previously for *Drosophila* sensory neurons<sup>6</sup>, and  
5 for neocortical pyramidal cells and PV interneurons<sup>1</sup>. Neocortical cells were visualized in  
6 P12–P20 acute mouse visual cortex slices using custom-built 2-photon imaging  
7 workstations (Scientifica UK) with ScanImage<sup>7</sup> v3.7 running in MATLAB (MathWorks).  
8 Two-photon excitation of Alexa-594 loaded via the patch pipette was obtained with a  
9 Ti:Sa laser (Spectraphysics MaiTai or Coherent Chameleon) tuned to 800–820nm, and  
10 data was acquired with Hamamatsu R3896 bi-alkali detectors and National Instruments  
11 PCI-6110 digitization boards. All recordings were in neocortical layer 5, as determined  
12 by the presence of conspicuous large pyramidal somata with characteristic apical  
13 dendrites, as visualized by Dodt contrast. PV interneurons were targeted in slices from  
14 GFP-expressing G42 mice<sup>8</sup> by tuning laser to 880–900nm and visualizing GFP  
15 fluorescence.

16 To produce Purkinje cell-specific expression of Brainbow, transgenic *Pcp2-cre* mice  
17 (Jackson Laboratory) were crossed to Brainbow 2.1 mice (line R, Jackson Laboratory).  
18 Five-month-old progeny were deeply anaesthetized (Ketamine/Xylazine, 80/5 mg/kg),  
19 and perfused with 4% paraformaldehyde. Sagittal brain slices were cut 24 hours later  
20 from the cerebellar vermis (100  $\mu$ m thick) using a Leica Vibratome 1000S, and mounted  
21 with Prolong Gold Antifade (Invitrogen). Images were collected with an Olympus  
22 confocal microscope with a 60X oil immersion objective (NA= 1.35), using the following  
23 laser wavelengths: 559nm, 515nm, and 440nm. Images (512 X 512 pixels) were acquired  
24 using a z-axis step of 0.5 $\mu$ m and were deconvolved with AutoQuant software (Media  
25 Cybernetics).

### Image Processing

26 Image processing was performed in Fiji<sup>9</sup>. Image fields were stitched together<sup>10</sup>, and  
27 fluorescence signal from filling pipettes and dye spillage (PV cells) or fluorescence  
28 artifacts (Brainbow cells) was eliminated manually. Background was eliminated through  
29 3D median filtering (typically radius=2–3), and stacks were segmented using one of  
30 ImageJ's built-in threshold methods. Due to diminished brightness, some image stacks  
31 were enhanced with the *TubeNess* plug-in (<http://fiji.sc/TubeNess>)<sup>11</sup>. Subsequently,  
32 bitmap Sholl was performed as described in the Batch Processing section of the *Sholl*  
33 *Analysis* internet documentation page, which contains most of the image processing  
34 routines used in this study.

1 Reconstructions were performed using Neuromantic<sup>12</sup> or, in the case of Brainbow tissue,  
2 with Neurolucida (MicroBrightField, Inc.). Neurolucida tracings were converted to the  
3 SWC format<sup>13</sup> using L-Measure<sup>14</sup>. Reconstructions were imported into Simple Neurite  
4 Tracer<sup>11</sup> using the appropriate coordinate offset so that the tracings would align optimally  
5 with the corresponding bitmap image. The Sholl technique for these reconstructions was  
6 performed using Simple Neurite Tracer, using a manually chosen point as the center of  
7 analysis. The closest voxel to this point was chosen for subsequent bitmap *Sholl Analysis*.  
8 For consistency, data was obtained using the minimum sampling distance allowed by the  
9 bitmap approach, i.e., the cube root of the product of the voxel dimensions.

10 Automated reconstructions of DIADEM projections were performed in Neural Circuit  
11 Tracer 2.0<sup>4</sup>. Scripts and instructions on how to process the DIADEM *OP\_1* dataset are  
12 available as **Supplementary Files**.

### Data Analysis

13 For Bland-Altman plots<sup>15</sup> of pyramidal cell apical dendrites, profiles were obtained as  
14 described above, using the main apical bifurcation as the center of analysis. Pairwise  
15 comparisons were performed at each sampled distance. Bias was calculated as the  
16 average of the differences between the two methods. Limits of agreement were calculated  
17 as bias  $\pm 1.96$  times the standard deviation of the differences.

18 For each neuron, we retrieved all the metrics calculated by the *Sholl Analysis* plug-in and  
19 performed clustering analysis following Principal Component Analysis as described  
20 elsewhere<sup>16,17</sup> (**Supplementary Fig. 4**). The first component (which accounted for 71.6%  
21 of the observed variation) was used as clustering variable. Hierarchical clustering was  
22 performed using Ward's method and squared Euclidean distances as linkage metric. A  
23 25% linkage cutoff, as normalized to the greatest separation in the data set, was used as a  
24 best-cut selection criterion for the number of found clusters<sup>17</sup>. Analyses were performed  
25 in JMP 10.0 (SAS Institute) and Prism 5.0 (Graphpad Software).

### Supplementary Files

#### Processing routines for the OP\_1 DIADEM dataset (related to Supplementary Figure 3).

26 Scripts used to obtain the data presented on Supplementary Fig. 3: ImageJ macros  
27 (OP\_1\_NoiseTest.ijm and OP\_1\_UserSeg.ijm) and Neural Circuit Tracer macro  
28 (OP\_1\_NCTracer.macro) used for automated reconstruction of the OP\_1 image.

## Supplementary References

1. Buchanan, K.A. et al. *Neuron* **75**, 451-66 (2012).
2. Brown, K.M. et al. *Neuroinformatics* **9**, 143-57 (2011).
3. Jefferis, G.S. et al. *Cell* **128**, 1187-203 (2007).
4. Chothani, P. et al. *Neuroinformatics* **9**, 263-78 (2011).
5. Lin, L.I. *Biometrics* **45**, 255-68 (1989).
6. Ferreira, T.A. et al. *Development* (2014, in press: doi:10.1242/dev.099655).
7. Pologruto, T.A. et al. *Biomed Eng Online* **2**, 13 (2003).
8. Chattopadhyaya, B. et al. *J Neurosci* **24**, 9598-611 (2004).
9. Schindelin, J. et al. *Nat Methods* **9**, 676-82 (2012).
10. Preibisch, S. et al. *Bioinformatics* **25**, 1463-5 (2009).
11. Longair, M.H. et al. *Bioinformatics* **27**, 2453-4 (2011).
12. Myatt, D.R. et al. *Front. Neuroinform.* **6**, 4 (2012).
13. Ascoli, G.A. et al. *Anat. Embryol.* **204**, 283-301 (2001).
14. Scorcioni, R. et al. *Nat Protoc* **3**, 866-76 (2008).
15. Bland, J.M. & Altman, D.G. *Lancet* **1**, 307-10 (1986).
16. Kozloski, J. et al. *Science* **293**, 868-72 (2001).
17. Everitt, B. *Cluster analysis*, Edn. 5th. (Wiley; 2011).
